# Supplementary material for: Modulatory Effects of the Kuwanon-Rich Fraction from Mulberry Root Bark on the Renin–Angiotensin System
Source: MDPI journal article supplement (doi:10.3390/foods13101547), 2024-05-16
Supplement: s1 [file s1]

## Supplementary tables

Table S1. CI (95%) analysis of each data set

| Figure No. | Experiment          | Group                           |               | Mean (95% CI)          |
|------------|---------------------|---------------------------------|---------------|------------------------|
| Figure 1   | A. Total polyphenol | MeOH                            | Root_Cheongil | 90.58 (89.39-91.77)    |
|            |                     |                                 | Root_Cheongol | 86.42 (80.00-92.83)    |
|            |                     |                                 | Root_Gwasang2 | 91.38 (88.86-93.91)    |
|            |                     |                                 | Root_Daeshim  | 94.18 (93.77-94.58)    |
|            |                     |                                 | Twig_Cheongil | 44.90 (43.71-46.10)    |
|            |                     |                                 | Twig_Cheongol | 52.23 (50.36-54.11)    |
|            |                     | CH <sub>2</sub> Cl <sub>2</sub> | Root_Cheongil | 86.89 (84.69-89.09)    |
|            |                     |                                 | Root_Cheongol | 89.96 (83.97-95.95)    |
|            |                     |                                 | Root_Gwasang2 | 89.12 (86.09-92.15)    |
|            |                     |                                 | Root_Daeshim  | 91.28 (87.11-95.46)    |
|            |                     |                                 | Twig_Cheongil | 67.59 (64.58-70.59)    |
|            |                     |                                 | Twig_Cheongol | 62.60 (58.25-66.94)    |
|            |                     | EtOAc                           | Root_Cheongil | 110.00 (106.04-113.97) |
|            |                     |                                 | Root_Cheongol | 105.11 (93.82-116.40)  |
|            |                     |                                 | Root_Gwasang2 | 103.21 (99.25-107.18)  |
|            |                     |                                 | Root_Daeshim  | 105.12 (103.67-106.57) |
|            |                     |                                 | Twig_Cheongil | 92.57 (87.23-97.91)    |
|            |                     |                                 | Twig_Cheongol | 90.37 (85.79-94.95)    |
|            |                     | BuOH                            | Root_Cheongil | 85.32 (80.83-89.82)    |
|            |                     |                                 | Root_Cheongol | 75.68 (69.97-81.40)    |
|            |                     |                                 | Root_Gwasang2 | 84.53 (77.10-85.95)    |
|            |                     |                                 | Root_Daeshim  | 80.20 (77.30-83.10)    |
|            |                     |                                 | Twig_Cheongil | 67.24 (62.91-71.57)    |
|            |                     |                                 | Twig_Cheongol | 73.48 (67.40-79.56)    |
|            |                     | Water                           | Root_Cheongil | 64.48 (61.74-67.22)    |
|            |                     |                                 | Root_Cheongol | 52.46 (47.97-56.96)    |

|              |                                 |               |                        |
|--------------|---------------------------------|---------------|------------------------|
|              |                                 | Root_Gwasang2 | 74.66 (74.11-78.21)    |
|              |                                 | Root_Daeshim  | 39.18 (38.27-40.09)    |
|              |                                 | Twig_Cheongil | 30.50 (29.51-31.48)    |
|              |                                 | Twig_Cheongol | 35.17 (32.86-37.48)    |
| B. Flavonoid | MeOH                            | Root_Cheongil | 120.30 (109.54-131.05) |
|              |                                 | Root_Cheongol | 148.46 (139.63-157.30) |
|              |                                 | Root_Gwasang2 | 154.57 (147.72-161.42) |
|              |                                 | Root_Daeshim  | 263.56 (256.07-271.05) |
|              |                                 | Twig_Cheongil | 18.38 (18.16-18.55)    |
|              |                                 | Twig_Cheongol | 23.20 (21.94-24.47)    |
|              | CH <sub>2</sub> Cl <sub>2</sub> | Root_Cheongil | 354.65 (343.64-365.67) |
|              |                                 | Root_Cheongol | 406.55 (385.95-427.16) |
|              |                                 | Root_Gwasang2 | 442.03 (439.49-444.57) |
|              |                                 | Root_Daeshim  | 402.72 (396.23-409.21) |
|              |                                 | Twig_Cheongil | 55.48 (50.88-60.07)    |
|              |                                 | Twig_Cheongol | 45.20 (41.32-49.07)    |
|              | EtOAc                           | Root_Cheongil | 366.44 (360.12-372.76) |
|              |                                 | Root_Cheongol | 427.93 (405.48-450.37) |
|              |                                 | Root_Gwasang2 | 376.39 (335.54-417.24) |
|              |                                 | Root_Daeshim  | 471.23 (465.24-477.23) |
|              |                                 | Twig_Cheongil | 127.74 (124.74-130.74) |
|              |                                 | Twig_Cheongol | 132.76 (121.39-144.14) |
|              | BuOH                            | Root_Cheongil | 57.93 (56.69-59.17)    |
|              |                                 | Root_Cheongol | 41.27 (39.63-42.91)    |
|              |                                 | Root_Gwasang2 | 36.48 (35.73-37.23)    |
|              |                                 | Root_Daeshim  | 53.42 (50.73-56.10)    |
|              |                                 | Twig_Cheongil | 20.06 (19.48-20.64)    |
|              |                                 | Twig_Cheongol | 25.40 (23.82-26.98)    |
|              | Water                           | Root_Cheongil | 18.10 (17.50-18.69)    |
|              |                                 | Root_Cheongol | 13.14 (12.69-13.60)    |
|              |                                 | Root_Gwasang2 | 24.21 (23.62-24.81)    |

|  |               |                     |
|--|---------------|---------------------|
|  | Root_Daeshim  | 12.27 (11.22-13.31) |
|  | Twig_Cheongil | 9.38(8.99-9.77)     |
|  | Twig_Cheongol | 13.55 (12.29-14.82) |

Figure 2 A. ACE relative inhibition

|        |           |                       |
|--------|-----------|-----------------------|
|        | BC        | 100 (84.15-115.85)    |
|        | IC        | 71. (43.45-98.78)     |
| MeOH   | 100 µg/mL | 96.02 (90.22-101.82)  |
|        | 50 µg/mL  | 94.86 (87.74-101.97)  |
|        | 10 µg/mL  | 23.39 (13.73-33.06)   |
| CH2Cl2 | 100 µg/mL | 100.89 (99.69-102.09) |
|        | 50 µg/mL  | 86.12(78.17-94.07)    |
|        | 10 µg/mL  | 81.32(76.60-86.04)    |
| EtOAc  | 100 µg/mL | 97.72 (95.87-99.57)   |
|        | 50 µg/mL  | 102.05 (95.70-108.40) |
|        | 10 µg/mL  | 95.01 (92.37-97.65)   |
| BuOH   | 100 µg/mL | 100.89 (95.09-106.69) |
|        | 50 µg/mL  | 94.78 (92.78-96.78)   |
|        | 10 µg/mL  | 6.38 (-1.54-14.30)    |
| DW     | 100 µg/mL | 9.37 (7.26-11.49)     |
|        | 50 µg/mL  | NA                    |
|        | 10 g/mL   | NA                    |

B. ACE relative inhibition

|  |               |                       |
|--|---------------|-----------------------|
|  | BC            | 100 (92.65-107.35)    |
|  | IC            | 81.53 (76.46-86.60)   |
|  | Twig_Cheongol | 42.62 (40.70-44.54)   |
|  | Twig_Cheongil | 63.98 (59.83-68.13)   |
|  | Root_Cheongol | 102.42 (91.08-113.75) |
|  | Root_Cheongil | 100.03 (98.76-101.31) |
|  | Root_Daeshim  | 98.33 (91.12-105.54)  |
|  | Root_Gwasang2 | 92.21 (87.08-97.34)   |

Figure 3 A. ACE relative inhibition

|    |                     |
|----|---------------------|
| BC | 100 (97.24-102.76)  |
| IC | 63.78 (55.51-72.06) |

|                            |               |                |                     |
|----------------------------|---------------|----------------|---------------------|
|                            |               | Resveratrol    | NA                  |
|                            |               | Oxyresveratrol | NA                  |
|                            |               | Mulberroside A | NA                  |
|                            |               | Kuwanon G      | 7.85 (-8.01-23.71)  |
|                            |               | Kuwanon H      | 19.39 (15.93-22.84) |
| B. ACE relative inhibition | BC            |                | 100 (70.84-129.16)  |
|                            |               | IC             | 83.48 (79.11-87.96) |
|                            | Kuwanon G     | 10 µg/mL       | 4.22 (2.32-6.13)    |
|                            |               | 100 µg/mL      | 39.24 (34.75-43.73) |
|                            | Kuwanon H     | 10 µg/mL       | 20.89 (17.65-24.12) |
|                            |               | 100 µg/mL      | 86.63 (80.32-92.94) |
|                            |               |                |                     |
| Figure 5                   | Weight gain   | HSD            | 6.05 (5.23-6.88)    |
|                            |               | RBE            | 5.27 (4.67-5.89)    |
|                            |               | RBF            | 5.44 (4.58-6.31)    |
|                            | Liver weight  | HSD            | 0.76 (0.69-0.84)    |
|                            |               | RBE            | 0.77 (0.73-0.82)    |
|                            |               | RBF            | 0.76 (0.71-0.82)    |
|                            | Kidney weight | HSD            | 0.28 (0.26-0.29)    |
|                            |               | RBE            | 0.27 (0.25-0.28)    |
|                            |               | RBF            | 0.27 (0.25-0.29)    |
|                            | Heart weight  | HSD            | 0.11 (0.10-0.11)    |
|                            |               | RBE            | 0.10 (0.10-0.11)    |
|                            |               | RBF            | 0.09 (0.09-0.11)    |
|                            | Serum Renin   | HSD            | 5.96 (4.74-7.19)    |
|                            |               | RBE            | 4.53 (3.47-5.59)    |
|                            |               | RBF            | 3.95(3.31-4.59)     |
|                            | Serum AGT     | HSD            | 9.87 (8.83-10.92)   |
|                            |               | RBE            | 8.43 (7.06-9.81)    |
|                            |               | RBF            | 7.37 (5.91-8.82)    |
